# Supplementary material
Source: PubMed Central journal article supplement (PMC8765261)
Supplement: aac.01649-21-s0001.pdf [file aac.01649-21-s0001.pdf]

**Supplementary Figure 1. NAO fluorescence intensity (A) and NAO localization by microscopy of cardiolipin synthase knockout mutants N315  $\Delta$ cls1 and N315  $\Delta$ cls2 (1, 2).**

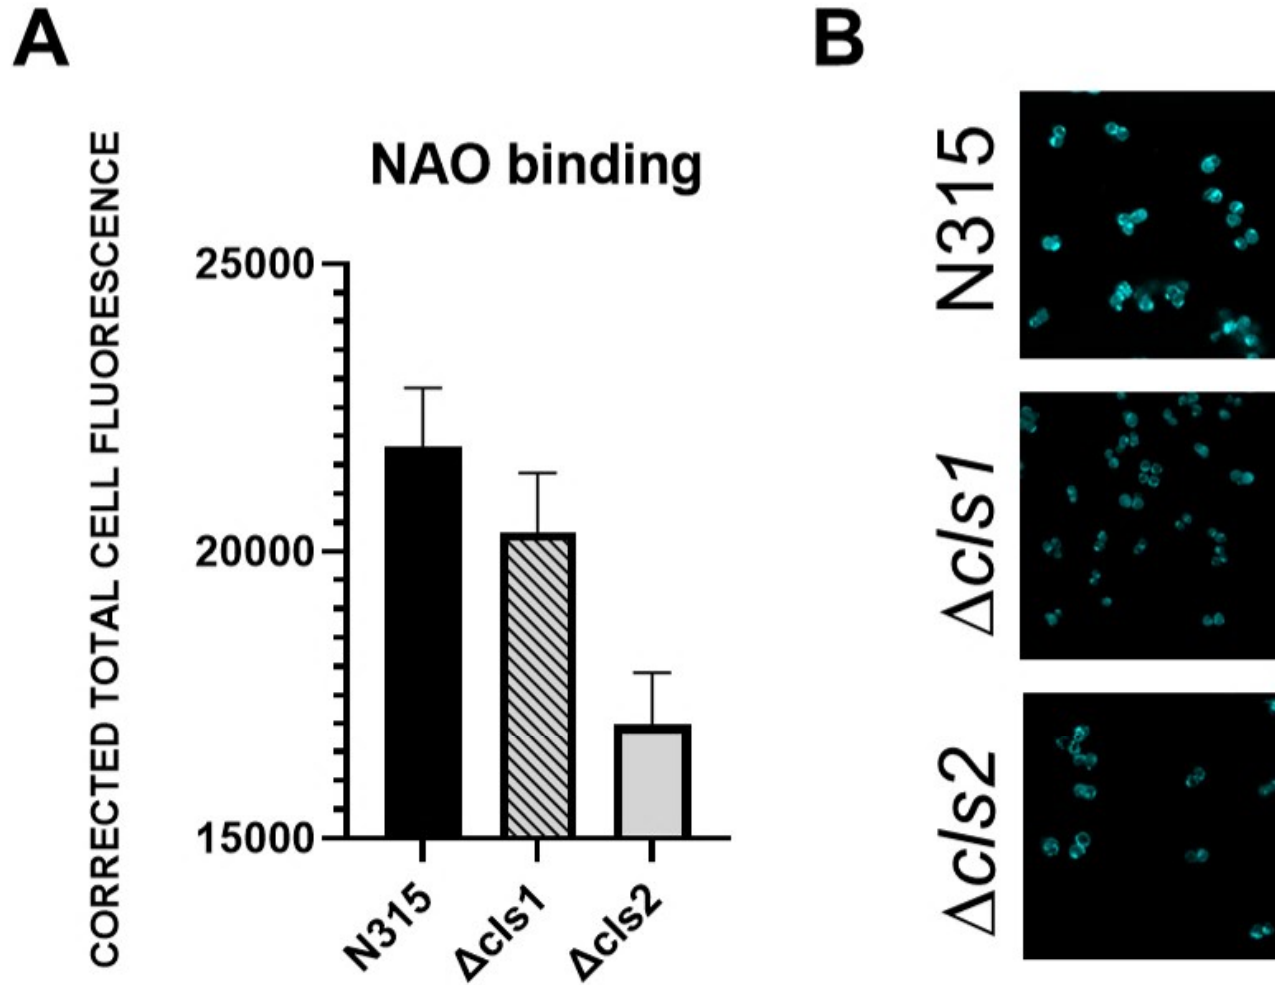

1. Ortiz Zacarias NV, Dijkmans AC, Burggraaf J, Mouton JW, Wilms EB, van Nieuwkoop C, Touw DJ, Kamerling IMC, Stevens J. 2018. Fosfomycin as a potential therapy for the treatment of systemic infections: a population pharmacokinetic model to simulate multiple dosing regimens. *Pharmacol Res Perspect* 6: e00378.
2. Zanetti M. 2004. Cathelicidins, multifunctional peptides of the innate immunity. *J Leukoc Biol* 75:39-48.
